# Supplementary material
Source: PubMed Central journal article supplement (PMC3117363)
Supplement: supp_btr270_supplementary_info.pdf [file supp_btr270_supplementary_info.pdf]

# 1 Decomposability of NIPD score

Our score for structure learning is based on the pseudo-likelihood of the data given model and requires us to compute the conditional probability distribution of each variable in a condition  $c$ . We require that the parameters of this conditional distribution be dependent such that we can pool the data from the different conditions to estimate the parameters. The conditional distribution,  $P(X_i|\mathbf{M}_{ci})$  in condition  $c$  is defined as a product:

$$P(X_i = x_{id}|\mathbf{M}_{ci} = \mathbf{m}_{cid}) \propto \prod_{\mathbf{E} \in \text{powerset}(\mathcal{C}) : c \in \mathbf{E}} P(X_i = x_{di}|\mathbf{M}_{\mathbf{E}i}^* = \mathbf{m}_{\mathbf{E}i}^*), \quad (1)$$

where  $d$  is the data point index and  $\mathbf{M}_{\mathbf{E}}^*$  is the Markov blanket (MB) of  $X_i$  exclusively in condition set  $\mathbf{E}$ . The proportionality sign can be eliminated by dividing the product by a normalization constant. Assuming a conditional Gaussian for the form of the conditional probability distribution, this normalization constant can be obtained by writing out the complete RHS of Eq 1, which has the form:

$$\mathcal{N}\left(x_{1id} \middle| \frac{\mu_{1id}\sigma_{3i}^2 * \mu_{3id}\sigma_{1i}^2}{\sigma_{3i}^2 * \sigma_{1i}^2}, \frac{\sigma_{1i}\sigma_{3i}}{\sqrt{\sigma_{1i}^2 * \sigma_{3i}^2}}\right) \mathcal{N}(\mu_{1id}|\mu_{3id}; \sqrt{\sigma_{1i}^2 * \sigma_{3i}^2})$$

The first Gaussian gives the normalized conditional probability distribution and the normalization term is  $\frac{1}{Z_{1id}} = \mathcal{N}(\mu_{1id}|\mu_{3id}, \sigma_{1i}^2 * \sigma_{3i}^2)$ , where  $\sigma_{3i}^2$  is the standard deviation from the condition set  $\{1, 2\}$ ,  $\mu_{1id} = \mathbf{w}_{1i}^T \mathbf{m}_{1id}^*$  is the mean of the conditional Gaussian using the  $d^{th}$  data point in condition 1.

However, we work directly with the product of conditionals, that is, the un-normalized conditional probability distribution for two reasons: (a) the score improvement can be computed very efficiently, and (b) the second Gaussian acts as a smoothing term over the parameter  $\mu_{1id}$ . In particular, if we were estimating a new parameter  $\mu_{1id}$ , the second Gaussian specifies the probability of the new  $\mu_{1id}$  using a Gaussian centered around the mean computed from the pooled dataset preferring network structures with means  $\mu_{1id}$  closer to the shared mean  $\mu_{3id}$ . Our preliminary experiments showed that this score has better performance than if we were to subtract out the normalization term.

# 2 Per-variable structure comparison

We compared the structure of the networks inferred by a pair of methods (e.g. INDEP vs NIPD) using a per-variable neighborhood comparison. Let  $\mathbf{M}_{1i}$  and  $\mathbf{M}_{1i}^{\text{INF}}$  denote the neighborhood of  $X_i$  in a true and inferred network, respectively. For each variable,  $X_i$ , we compare  $\mathbf{M}_{1i}$  to  $\mathbf{M}_{1i}^{\text{INF}}$  to obtain a *precision*:  $P_{1i} = \frac{|\mathbf{M}_{1i} \cap \mathbf{M}_{1i}^{\text{INF}}|}{|\mathbf{M}_{1i}^{\text{INF}}|}$ , *recall*:  $R_{1i} = \frac{|\mathbf{M}_{1i} \cap \mathbf{M}_{1i}^{\text{INF}}|}{|\mathbf{M}_{1i}|}$ , and *F-score* match:  $\frac{2P_{1i}R_{1i}}{P_{1i}+R_{1i}}$ . We obtain F-scores for  $q$  equal-sized partitions of the data, where  $q \in \{3, 4, 5, 6, 7, 8, 9, 10\}$ , and networks learned for each partition. The training data size decreased with increasing  $q$ . We then obtain the number of variables on which one method has a significantly higher F-score than another, as a function of training data size.

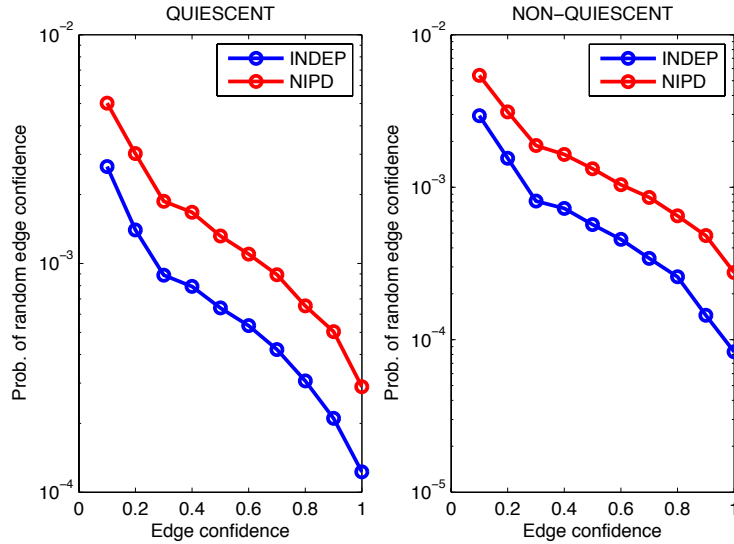

Figure 1: Probability of observing an edge with a particular confidence  $\tau$  as a function of confidence. The left graph is for quiescent population and the right is for non-quiescent. Probability is estimated by the number of edges that have a confidence of  $\geq \tau$  divided by the total number of possible edges subject to the constraint that non-deletion genes can have no more than 8 neighbors.

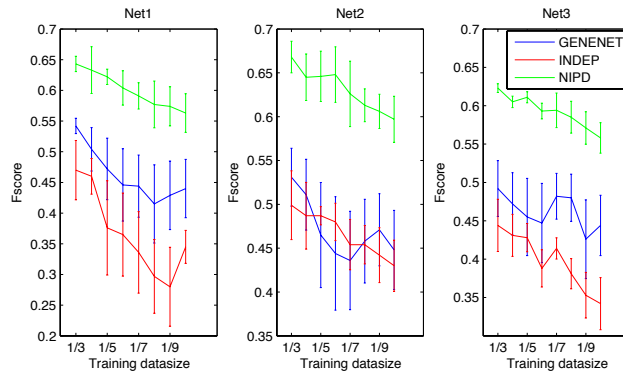

Figure 2: F-score of INDEP, NIPD and GeneNet as a function of decreasing training data for three networks, one per condition. Higher is better.

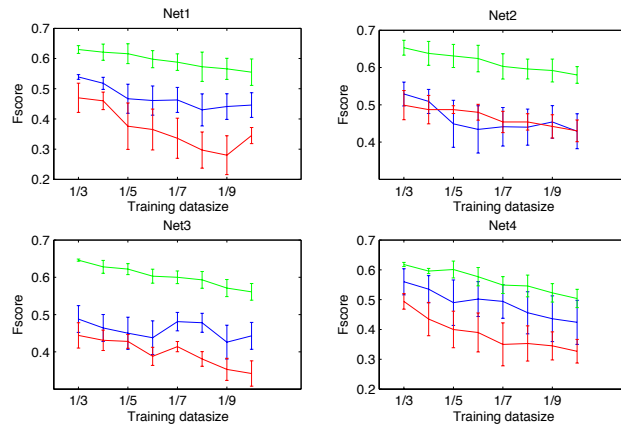

Figure 3: F-score of INDEP, NIPD and GeneNet as a function of decreasing training data for four networks. Higher is better.

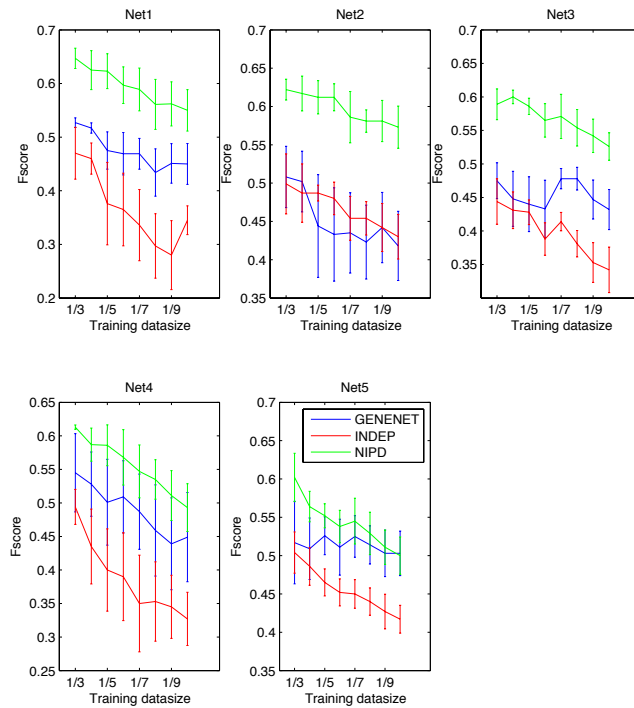

Figure 4: F-score of INDEP, NIPD and GeneNet as a function of decreasing training data for five networks. Higher is better.

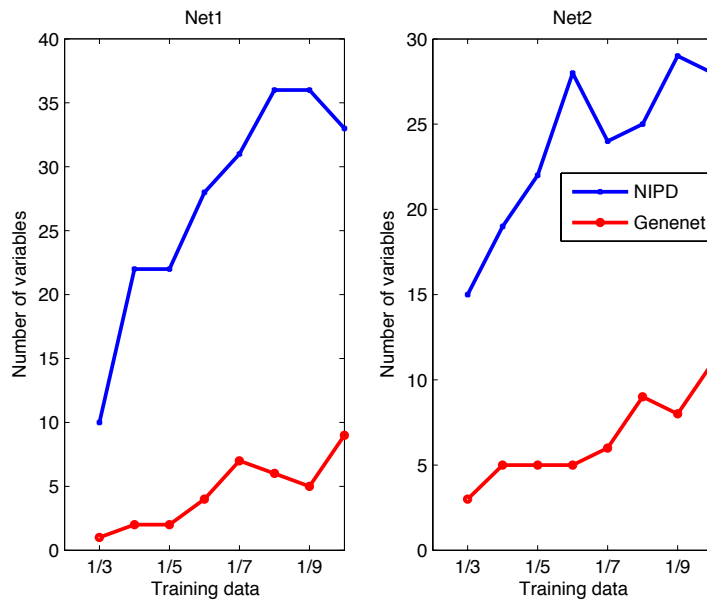

Figure 5: Number of variables on which one algorithm is significantly better than another using datasets for two networks from the HIGHSIM dataset. Comparison for NIPD and GENENET are shown. An algorithm is assessed on the quality of the Markov blanket it identifies for each gene. Specifically, for each fold, we infer a network from which we obtain a collection of Markov blanket match scores, one for each fold and ask if the scores of a variable are significantly better than the scores from another algorithm. The y-axis shows the number of variables with a higher score in one algorithm versus the other.

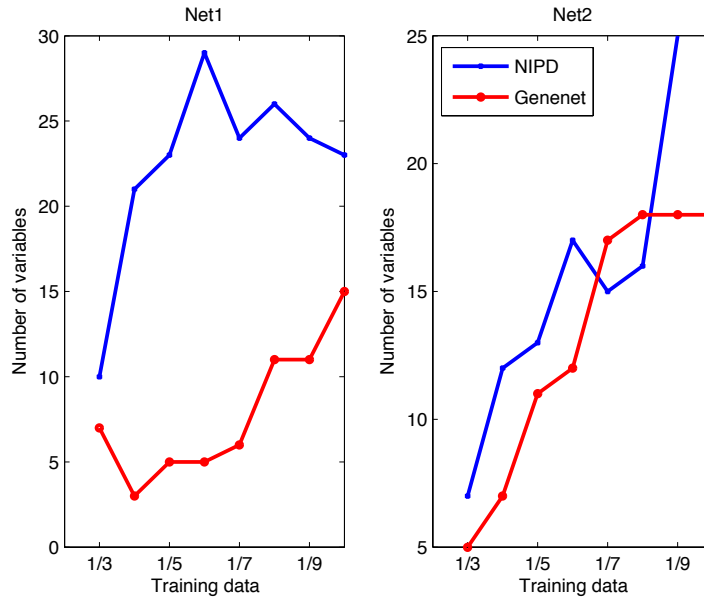

Figure 6: Number of variables on which one algorithm is significantly better than another using datasets for two networks from the LOWSIM dataset. Comparison for NIPD and GENENET are shown. Legend same as Fig 5

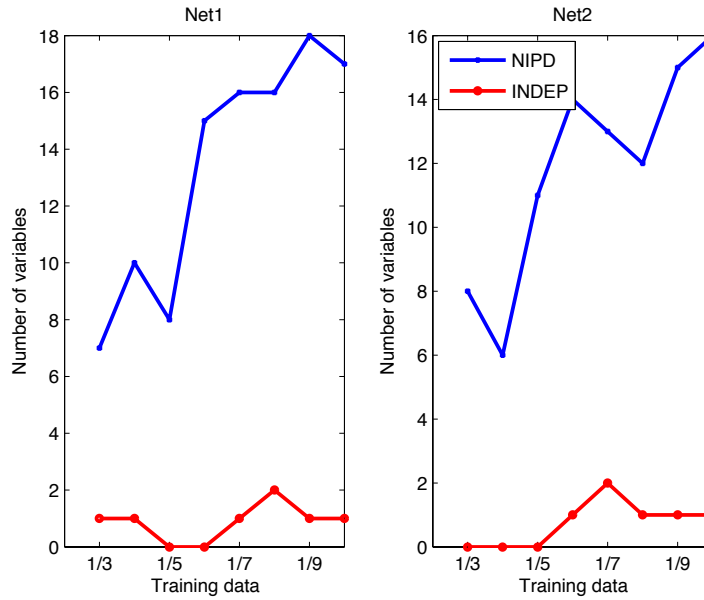

Figure 7: Number of variables on which one algorithm is significantly better than another using datasets for two networks from the HIGHSIM dataset. Comparison for NIPD and INDEP are shown. Legend same as Fig 5

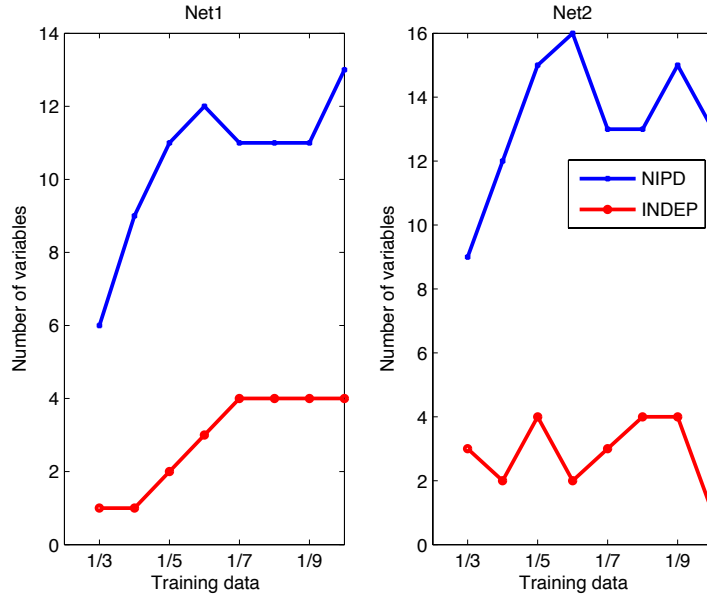

Figure 8: Number of variables on which one algorithm is significantly better than another using datasets for two networks from the LOWSIM dataset. Comparison for NIPD and INDEP are shown. Legend same as Fig 5

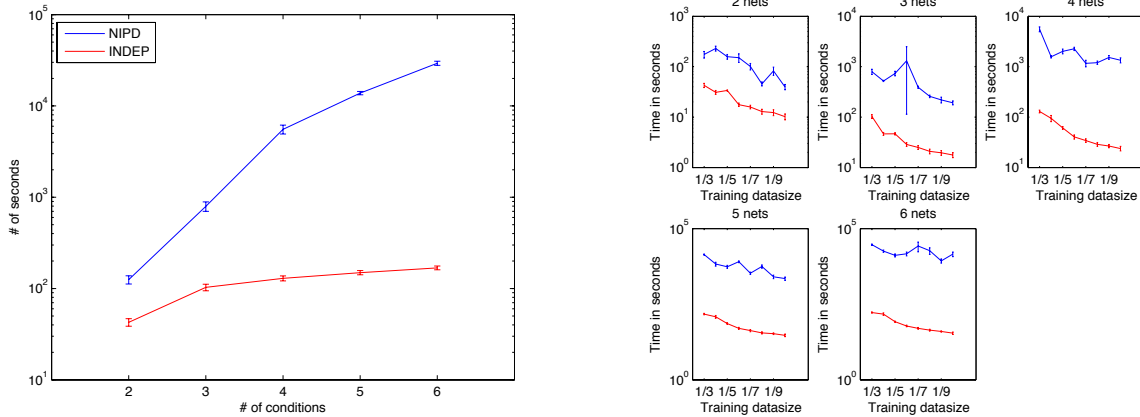

Figure 9: Left: Runtime of NIPD and INDEP as a function of the number of conditions where the dataset per condition was split into three parts and the average runtime per part was measured. Right: Each subplot shows the run time of NIPD and INDEP for different number of conditions (2-6) as a function of the size of training dataset size. The training dataset size decreases as we go to the right.

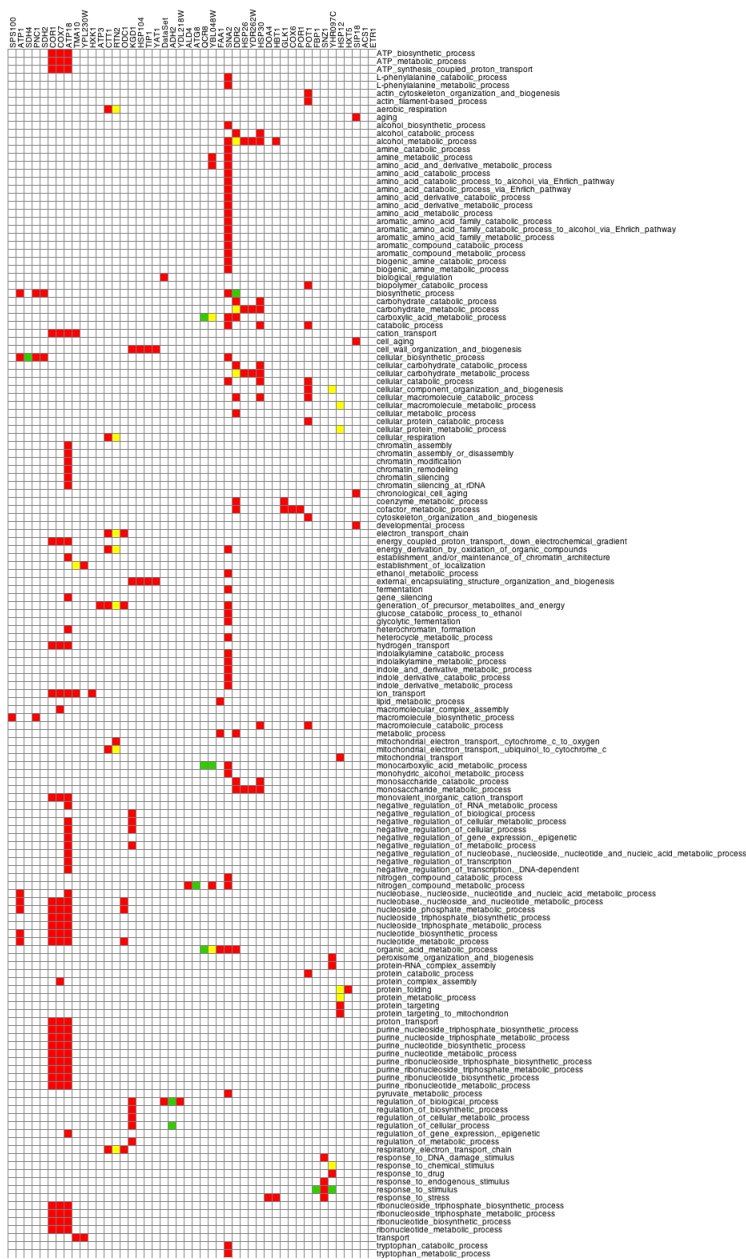

Figure 10: GO Processes (rows) affected by individual deletion mutants (columns). Colors indicate shared (yellow) affects, quiescent-specific affect (red) and non-quiescent-specific affect (green).

| Population     | $\Delta$ mutant pair | Overlap targets        |
|----------------|----------------------|------------------------|
| Q              | ATP1*, SDH4*         | SDH1,HST2              |
|                | ATP3*, COX6*         | COX4,COX12             |
|                | ETR1*, PST2*         | ARA1,PDA1,AYR1         |
|                | RIP1*, KGD1*         | ATP16,COX5A            |
|                | SDH4*, ATP2*         | MIR1,NDI1              |
|                | AGX1, ATP2*          | MIR1,NDI1              |
|                | CTA1*, ADH2          | ATO3,POX1              |
|                | ETR1*, OM14          | ARA1,FMP37             |
|                | ETR1*, POT1          | FAA2,PDA1              |
|                | FMP45*, YDR262W      | COQ4,ADR1              |
|                | QCR7*, ATP18         | ILV1,ECM32             |
|                | QCR7*, QCR8          | YEL076C-A,QCR6         |
|                | QCR8, COX7*          | QCR6,COX13             |
|                | SDH4*, AGX1          | MIR1,NDI1              |
|                | CTT1, FBP1           | DLD1,ACP1              |
|                | HXK1, HSP104         | HSP42,STI1             |
|                | RTN2, ALD3           | SOL4,YJL016W           |
|                | YDL218W, HSP12       | TKL2,GND2              |
|                | NQ                   | ATP3*, COX6*           |
| ETR1*, PST2*   |                      | ARA1,PDA1,YFR044C,SBP1 |
| RIP1*, KGD1*   |                      | YLL029W,COX5A          |
| ADY2*, ADH2    |                      | ATO3,HMG1              |
| AGX1, ATP2*    |                      | MIR1,NDI1              |
| COX6*, YLR312C |                      | PSP1,GPX1              |
| CTA1*, POT1    |                      | FOX2,CAT2              |
| HBT1*, YDR262W |                      | COQ4,SSD1              |
| HXT5, KGD1*    |                      | SYG1,KNS1              |
| OM45*, ALD4    |                      | MDH3,GDH2              |
| QCR7*, QCR10   |                      | YEL076C-A,ILV1         |
| RTN2, GTT1*    |                      | YFL043C,BCY1           |
| ADH2, ALD4     |                      | ATO3,POX1,CAT2,LSC1    |
| COR1, YDR262W  |                      | ADR1,YNL190W           |
| HSP30, SPI1    |                      | SPT2,CPR6              |
| HXK1, HSP104   |                      | HSP42,STI1             |
| NGR1, SPS100   |                      | ALT2,AMS1              |
| OM14, FBP1     |                      | YGR079W,PUT4           |
| OM14, XBP1     |                      | YGR079W,PUT4           |
| QCR10, QCR8    |                      | YEL076C-A,COX13,QCR9   |
| XBP1, FBP1     | YGR079W,PUT4         |                        |

Table 1: NIPD predictions for double deletions ( $\Delta$  mutant pair) and their common targets for quiescent and non-quiescent cells \*Single gene deletions shown to have a phenotype using viability assays in stationary phase, or in quiescent and non-quiescent cells in Martinez *et al.* 2004, and Aragon *et al.* 2008
